1 **KASP-PCR method to screen thrombophilia genetic risk**  
2 **factors**

3

4 **Reham Altwayan<sup>1,2</sup>, Huseyin Tombuloglu<sup>2\*</sup>, Abdulrahman Alhusil<sup>3</sup>, Taghreed**  
5 **Awadh<sup>3</sup>, Mona Altwayan<sup>3</sup>, Heba Albaqawi<sup>3</sup>, Noof Aldossary<sup>3</sup>, Turgay Unver<sup>4</sup>**

6

7 <sup>1</sup>Master Program of Biotechnology, Institute for Research and Medical Consultations, Imam  
8 Abdulrahman Bin Faisal University, Dammam, Saudi Arabia

9 <sup>2</sup>Department of Genetics Research, Institute for Research and Medical Consultations (IRMC),  
10 Imam Abdulrahman Bin Faisal University, 31441, Dammam, Saudi Arabia

11 <sup>3</sup>Department of Internal Medicine, King Fahad Military Medical Complex, Dhahran, Saudi  
12 Arabia

13 <sup>4</sup>Department of Computer Engineering, Ostim Technology University, Ankara, Turkey

14

15 [\\*htoglu@iau.edu.sa](mailto:htoglu@iau.edu.sa)

16

## 17 **Abstract**

18 Thrombophilia is defined as the willingness of blood to clot easily in a situation of  
19 imbalances between fibrinolysis and coagulation. It is classified as inherited and  
20 acquired thrombophilia. Several studies revealed that the inherited thrombophilia is  
21 strongly associated with single nucleotide polymorphisms (SNP) or deletions on certain  
22 genes, such as *FV Leiden (rs6025)*, *MTHFR1 (rs1801133)*, *MTHFR2 (rs1801131)*,  
23 *Serpine-1 (rs1799768)*, and *Factor II (rs1799963)*. This study aims to develop an SNP  
24 detection panel based on Kompetitive Allele Specific Primer-polymerase chain reaction  
25 (KASP-PCR) technique. Results revealed that 86.5% of susceptible patients (n = 111)  
26 contain at least one mutation; while seven of them harbor three thrombophilia-associated  
27 mutations simultaneously. A clear allelic discrimination was observed for all tested  
28 samples. The prevalence of each mutation among different countries and ethnic groups  
29 are in line with the findings of this study. Rather than expensive and time-consuming  
30 approaches, the current assay enables the cost-effective advantage of the KASP-PCR,  
31 which reduces the diagnostic cost with a fast and convenient way. After clinical  
32 validation and approval, it can be used in hospitals, research centers, and diagnostic  
33 laboratories to determine the genetic susceptibility of individuals to thrombosis and for  
34 research purposes.

35

36 **Keywords:** SNP, thrombophilia, prevalence, molecular diagnosis, mutation.

37

## 38 **Introduction**

39 Thrombophilia is defined by the World Health Organization/International Society of  
40 Thrombosis and Hemostasis (WHO/ISTH) as an abnormal tendency to coagulation or  
41 clotting of the blood in a part of the circulatory system (WHO, 1995). The disease poses  
42 a significant health burden. According to the CDC reports, >900,000 people in the  
43 United States alone are affected by blood clots each year, with substantial mortality  
44 rates. Due to thrombophilia-related complications, 60,000 to 100,000 deaths are  
45 recorded in the USA annually, which is greater than the total number of people who lose  
46 their lives each year from AIDS, breast cancer, and motor vehicle crashes combined  
47 (Badireddy & Mudipalli, 2022). The disease is classified as inherited and acquired

48 thrombophilia. Inherited thrombophilia is associated with four SNPs and one deletion  
49 mutations located in different genes, namely: coagulation *factor II (FII)*, coagulation  
50 *factor V (FV)*, *5,10- methylene tetrahydrofolate reductase (MTHFR1 and MTHFR2)*,  
51 and *serpine1 (SERPINE1)* (Yapjajakis et al, 2015).

52 Diagnostic approaches include detecting disorders by examining clinical signs,  
53 imaging techniques, and analysis through molecular aspects. Direct DNA genotyping,  
54 PCR-based techniques, immunological detection, and chromogenic assays are used to  
55 identify thrombophilia-related disorders (Linnemann and Hart 2019). Sequencing  
56 techniques are the most accurate approaches followed and used for validation purposes.  
57 On the other hand, PCR-based approaches such as TaqMan, KASP and rhAmp are  
58 mostly used due to their simplicity, timesaving, cost-effectiveness, and ability to  
59 measure the heterozygosity or homozygosity of mutations carried among thrombophilia  
60 genes.

61 Kompetitive Specific Allele Primer-PCR (KASP-PCR) is a fluorescent-based  
62 reporting system to identify and measure the SNPs (He et al., 2014). It is used to  
63 differentiate between species in plants and animals (Yang et al., 2020). KASP-PCR  
64 technique is fast, sensitive, relevant, and cost-effective (Alvarez-Fernandez et al., 2021;  
65 Zhang et al., 2020). Due to the cost advantage, it has been applied widely in plant  
66 breeding for commercial use (Makhoul et al., 2020). KASP technique is precise, and its  
67 specificity is based on the competitive nature of allele specific forward primers and  
68 modified Taq polymerase.

69 The current genotyping techniques are based on sequencing or PCR, which are  
70 time consuming and expensive methods. Therefore, a cost-effective, time-saving, and  
71 accurate technique is needed to screen symptomatic and asymptomatic suspicious  
72 people. This study aims to screen thrombophilia associated SNPs based on KASP-PCR  
73 technique. For this purpose, the DNA samples of thrombophilia-susceptible patients (n =  
74 111) were collected and five associated mutations on *FV Leiden*, *MTHFR1*, *MTHFR2*,  
75 *Serpine-1*, and *Factor II* genes were identified. Rather than expensive and time-  
76 consuming approaches, the current assay reduces the diagnostic cost in a fast and  
77 convenient way.

78

## 79 **Material and Methods**

### 80 **Collection of blood samples and ethical concerns**

81 5 mL of leftover whole blood samples were retrieved from King Fahad Military Medical  
82 Complex (KFMHC) (IRB Protocol No: AFHER-IRB-2022-031). A total of 111 samples  
83 have been collected from thrombophilia-susceptible patients who have been admitted to  
84 the hospital with thrombophilia symptoms, such as chest pain, abdominal pain,  
85 dizziness, fever, seizure, breath shortness, etc. The blood samples were collected in an  
86 Ethylenediamine tetra acetic acid tube (EDTA) and stored at -20 °C until DNA  
87 extraction.

88

### 89 **Extraction of DNA**

90 QIAamp® DNA Blood Mini Kit 250 (QIAGEN) was used to extract and purify DNA.  
91 The instructions of the manufacturer were followed. The final eluate was kept at -20 °C  
92 for further stages. NanoDrop™ 2000/2000c spectrophotometer was used to quantify the  
93 purity and concentration of extracted DNA samples. The samples were also visualized in  
94 agarose gel for 20 min at 100 Volt and monitored under UV light (Molecular Imager®  
95 ChemiDoc™ XRS+, Bio-Rad). Image Lab™ Software (Bio-Rad) was utilized to save  
96 the images.

97

### 98 **Primer design**

99 Primers corresponding to the SNP positions were manually designed. First, the  
100 corresponding gene sequences were retrieved from NCBI database  
101 (<https://www.ncbi.nlm.nih.gov>) and Primer Blast tool was used to pick the primers. In  
102 addition, Primer 3 program was used to verify the designed primers: one common  
103 reverse, two alternating forward primers that are specific to the SNP positions.

104

### 105 **Validation of plate reader and KASP-PCR reaction**

106 Before genotyping, KASP genotyping validation kit (LOW ROX KASP TF Validation  
107 kit, LGC) was used to validate the plate-reader instrument (7500 Fast Real-Time PCR  
108 System). According to the manufacturer's protocol, the compatibility and readability of  
109 the plate reader was confirmed. The kit consists of three tubes of diluted fluorophores:  
110 FAM, HEX, and HEX/FAM. The tubes were briefly vortexed and dispensed into a  
111 microtiter plate. Then, KASP reagents (2x KASP master mix, and 72x KASP assay mix)  
112 with provided DNA samples (n = 36) were used to run the following protocol: (1) 94 °C

113 15 minutes for activation (1 cycle); (2) 94 °C 20 sec for denaturation and 61-55 °C 60  
114 sec (drop 0.6 °C per cycle) for annealing/elongation (10 cycles); (3) 94 °C 20 sec for  
115 denaturation and 55 °C 60 sec for annealing/elongation (26 cycles). At the end of the  
116 reaction, the endpoint fluorescent reading was performed. To obtain the best genotyping  
117 clusters, the plate underwent two rounds of recycle steps, as follows: 94 °C 20 sec for  
118 denaturation, and 57 °C for 60 sec for annealing/elongation (3 cycles).

119

### 120 **Genotyping of thrombophilia-associated SNPs with KASP-PCR**

121 The KASP primer mixture for each target SNPs was prepared including 12 µl of  
122 forward-1 primer, 12 µl of forward-2 primer, 30 µl of common reverse primer, and 46 µl  
123 of distilled water to reach the total volume of 100 µl. Then, 5 µl of master mixture  
124 (KASP™ TF Low ROX Master Mix) and 0.14 µl of assay mixture were added and  
125 vortexed briefly. In 96 well plate, 5 µl of assay mixture was added with 5 µl of DNA  
126 sample in each well and then sealed tightly. The KASP genotyping assay was performed  
127 by using real-time PCR 7500 (Applied Biosystem) instrument.

128

## 129 **RESULTS**

### 130 **Calibration and optimization of KASP protocol**

131 Before the KASP-PCR reaction for the discrimination of thrombophilia-associated  
132 SNPs, the validity of the fluorescent thermal cycler and the protocol for KASP-PCR  
133 were optimized and validated. Nine positive control samples (LGC Bioscience), labeled  
134 with FAM (blue), HEX (red), and FAM/HEX (green) fluorophores, were used to  
135 optimize, and verify the fluorescence signals that will be obtained from the thermal  
136 cycler. **Figure 1** depicts the cluster plot of FAM, HEX, and FAM/HEX labeled positive  
137 control samples. The clusters correspond to homozygote dominant (allele 1/allele 1),  
138 homozygote recessive (allele 2/allele 2), and heterozygote (allele 1/allele 2)  
139 discriminations. This result showed optimized and successful KASP-PCR reaction  
140 conditions with calibrated fluorometric measurements.

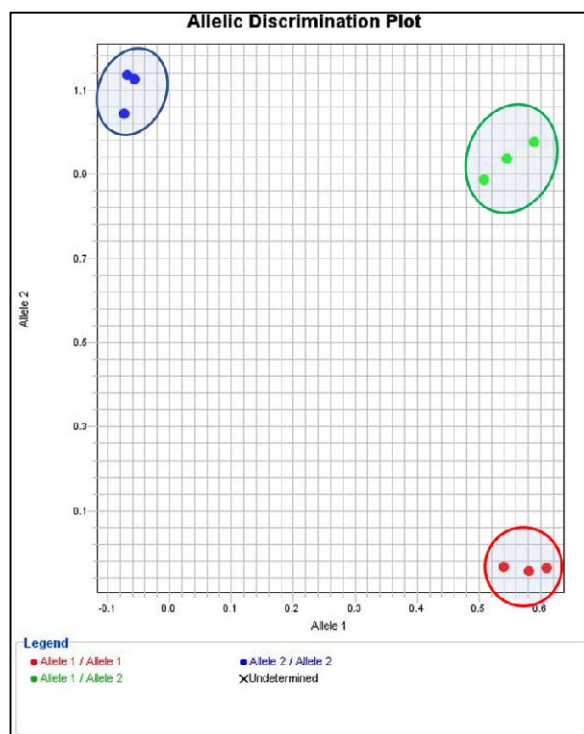

141

142 **Figure 1.** The allelic discrimination plot of FAM (blue), HEX (red) and FAM/HEX  
143 (green) fluorophores. Three samples used for each positive control dyes.

144

145 Furthermore, the optimized protocol was used to discriminate real DNA samples  
146 (n = 45) provided by the LOW ROX KASP TF Validation kit (LGC Biosciences). In  
147 addition to the DNA samples, three negative control samples were included. After the  
148 KASP-PCR reaction, the allelic discrimination plot was depicted in **Figure 2**. The results  
149 were shown before (**Figure2A**) and after three (**Figure2B**) and six (**Figure2C**) additional  
150 recycling stages. After six recycling stages, positive and negative samples were clearly  
151 separated, and the negative control specimens were placed near the origin side of the plot.  
152 In addition, the homozygote and heterozygote alleles were determined to be well-  
153 clustered. It is obvious that additional recycling steps improved the allelic discrimination,  
154 where the best and most efficient results were obtained upon six additional recycling  
155 stages (**Figure 2C**).

156



165 **KASP-PCR genotyping of rs6025 (G1691A) on the Factor V Leiden gene**

166 An optimized KASP-PCR protocol was performed to identify the G1691A substitution  
167 on the *FVL* mutation (*FV* gene, rs6025). **Figure 3.** shows the discrimination plots of  
168 samples. Since the total sample number (n = 111) is more than the capacity of the  
169 thermal cycler (n = 96), the reaction was completed in two separate runs. Upon the  
170 KASP-PCR reaction, an additional six recycling steps was added for the best reaction  
171 performance. Black dots indicate negative control, green dots indicate heterozygote  
172 sample (CT), and blue dots indicate homozygote (CC). Accordingly, only one sample  
173 was detected as heterozygote (~1%), and the rest of the samples were homozygote wild  
174 (~99%). This result shows that almost all thrombophilia-susceptible individuals admitted  
175 to the hospital are free of *FVL* gene mutation.  
176

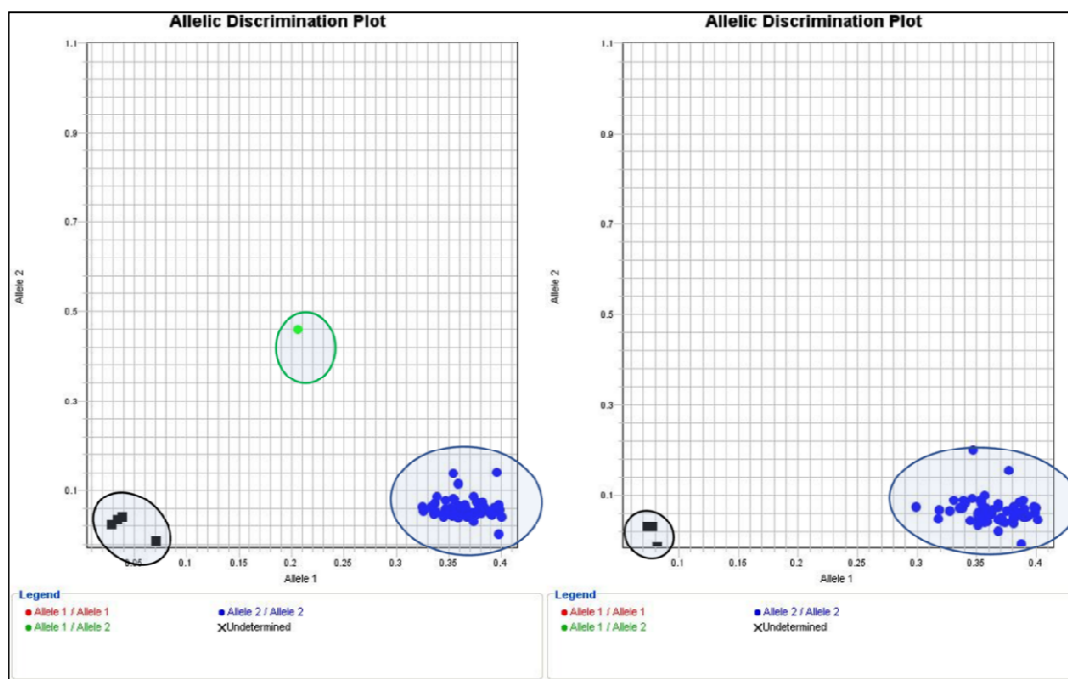

177  
178 **Figure 3.** The figure shows the discrimination plot of FVL mutation with an additional 6  
179 cycles. Black dots indicate negative control, green dot indicate heterozygote sample  
180 (CT), and blue dots indicate homozygote wild (CC).

181

182 **KASP-PCR genotyping of (rs1799963) (G20210A) on the *FII* gene**

183 KASP-PCR assay was performed to screen the G20210A variation on the *FII-PT* gene.  
184 **Figure 4.1** depicts the discrimination plots of extracted DNA samples. Since the



185 capacity of the PCR plate is 96 wells, the run was divided into two runs. In addition to  
186 the KASP-PCR thermal cycle, six more recycling step was added to improve  
187 discrimination. Black dots refer to negative control, placed near the plot's origin side;  
188 blue dots refer to homozygote wild samples (GG); red dot sample is homozygote mutant  
189 (AA), while no green dots of heterozygote recorded. Only one sample was recorded as  
190 homozygote recessive, while the rest of the sample was homozygote dominant, and no  
191 heterozygote detected. This result shows that only one of the susceptible thrombophilia  
192 patients carried the *FII-PT* mutation.  
193

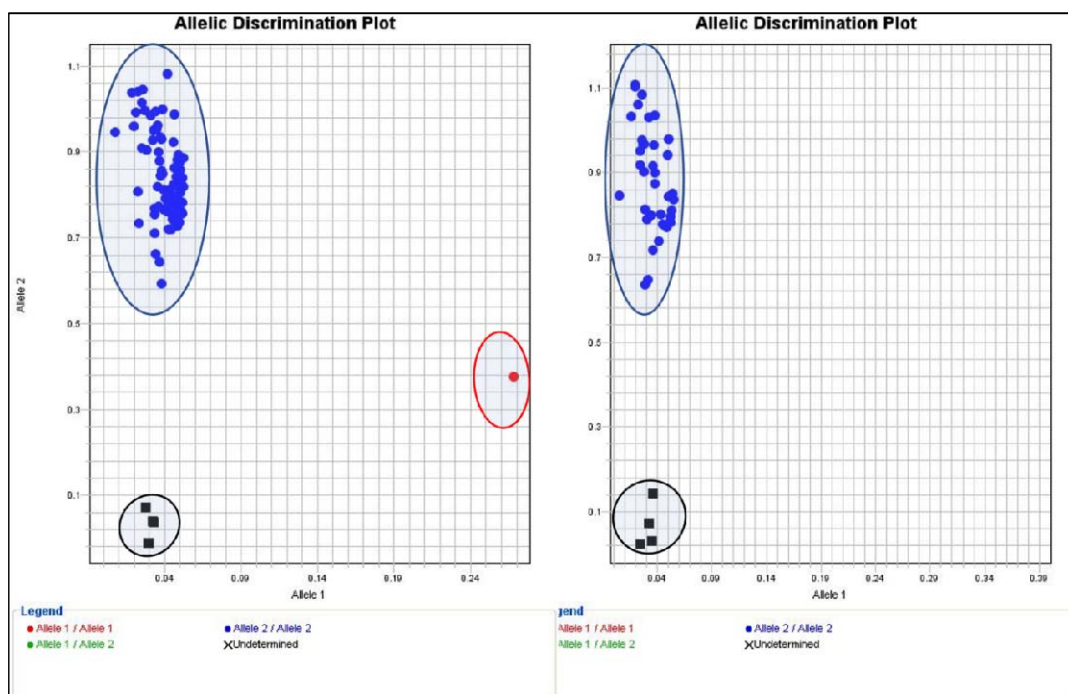

194  
195 **Figure 4.1** Shows the discrimination plot of *Factor II* mutation with an additional 6  
196 cycles. Black dots indicate negative control, blue dots indicate homozygote wild (GG),  
197 and red dots indicate homozygote mutant (AA).

#### 198 199 **KASP-PCR genotyping of (rs1801133) on the *MTHFR* gene**

200 After optimization of the KASP-PCR assay, screening for mutation on *MTHFR1* was  
201 performed (*MTHFR* gene, rs1801133). **Figure 25** illustrates the discrimination plot of  
202 susceptible-thrombophilia patient samples. The reaction was completed in two runs due  
203 to the number of samples (n=111). In addition, six recycling steps were added to obtain  
204 clear discrimination. Four black dots refer to negative control and are correctly placed

205 near the origin of the plot, green dots refer to the heterozygote sample (CT), and red dots  
206 refer to the homozygote sample (CC). Consequently, 24 % of the patients were  
207 heterozygote, only two samples were recorded as homozygote recessive (TT) (~2%),  
208 and the rest of the samples were recorded as homozygote dominant. This result shows  
209 that ~26% of the patients admitted to the hospital with a risk of developing  
210 thrombophilia are carrying at least one allele of *MTHFR1* mutation.  
211

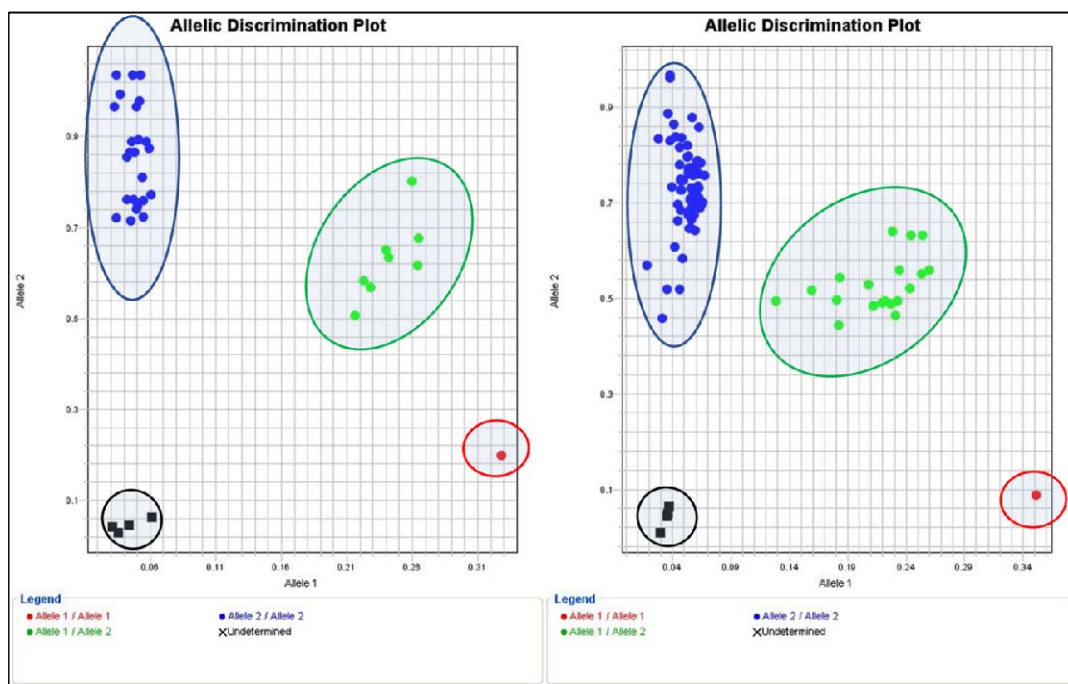

212  
213 **Figure 2.** Shows the Allelic Discrimination Plot of *MTHFR* rs1801133 (C/T) mutation  
214 with an additional 6 cycles. Black dots indicate negative control; green dots indicate  
215 heterozygote (CT); and red dots indicate homozygote mutant (TT); blue dots indicate  
216 homozygote.

### 217 218 **KASP-PCR genotyping of (rs1801131) on the *MTHFR2* gene**

219 An optimized KASP-PCR assay was achieved to screen the mutation placed on the  
220 *MTHFR2* gene (rs1801131). **Figure 3** demonstrates the discrimination plot of two runs  
221 performed on extracted DNA samples. With the addition of six thermal recycling steps,  
222 the reaction shows the best performance. Black dots imply negative control; green dots  
223 imply heterozygote sample (AC), blue dots imply homozygote wild (AA), and red dots  
224 imply homozygote recessive (CC) alleles. Discrimination results showed that ~53% of

225 the patients admitted to the hospital are free of mutation (wild), 39% carrying this  
226 mutation in one allele, and 6.3% carrying two alleles of mutation. The result shows that  
227 ~45% of susceptible thrombophilia patients have at least one mutation.  
228

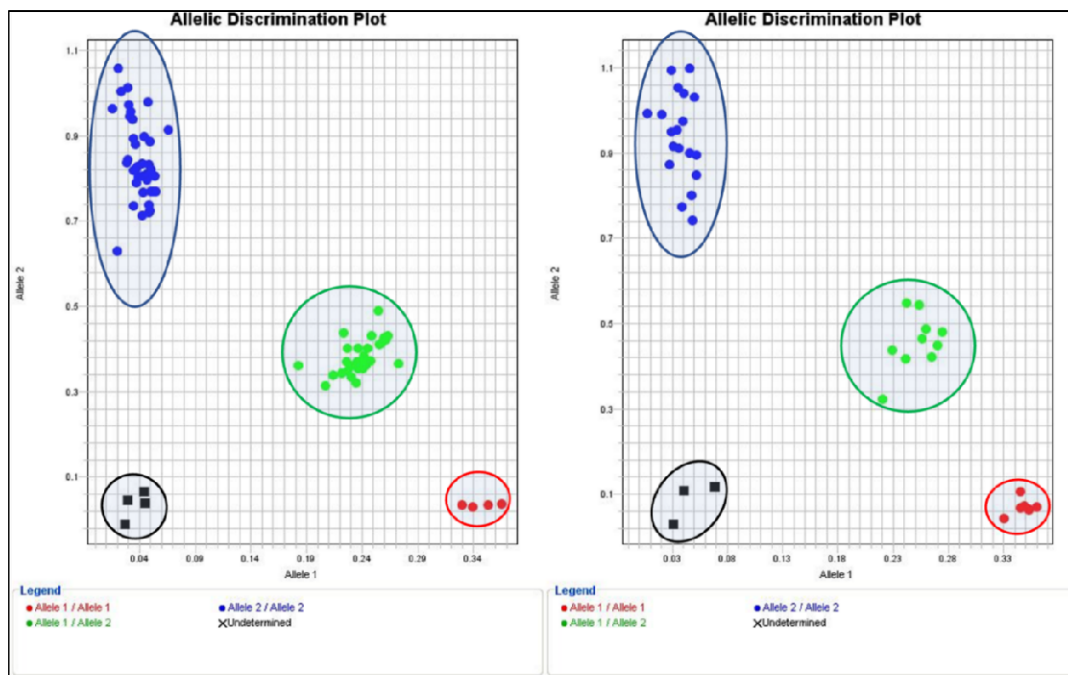

230 **Figure 3.** Shows the Allelic Discrimination Plot of *MTHFR* rs1801131 mutation with  
231 the addition of 3 cycles. Black dots indicate negative control; red dots indicate  
232 homozygote mutant (CC), green dots indicate heterozygote (AC), and blue dots indicate  
233 homozygote wild.

234

### 235 **KASP-PCR genotyping of *Serpine 1* (rs1799768)**

236 Genetic screening for *Serpine 1* (rs1799768) mutation was performed by optimized  
237 KASP-PCR assay. **Figure 7** shows the discrimination plot of the (n=111) sample  
238 divided into two runs due to the capacity of the thermal cycler. Black dots indicate  
239 negative control, and it is successfully placed near the origin of the plot; blue dots  
240 indicate homozygote dominant 5G/5G, green dots indicate heterozygote 5G/4G and red  
241 dots indicate homozygote recessive 4G/4G. Unlike other genes, only three additional  
242 thermals are needed to obtain clear discrimination of samples. Therefore, 47 of the  
243 sample was detected as homozygote dominant (~42%), 44 of the sample were detected  
244 as heterozygote by carrying one mutation (~39%), and 17 were detected as homozygote

245 recessive (~15%). The result shows that more than 50% of patients harbor *Serpine 1*  
246 mutation, which increases the risk of developing thrombophilia.  
247

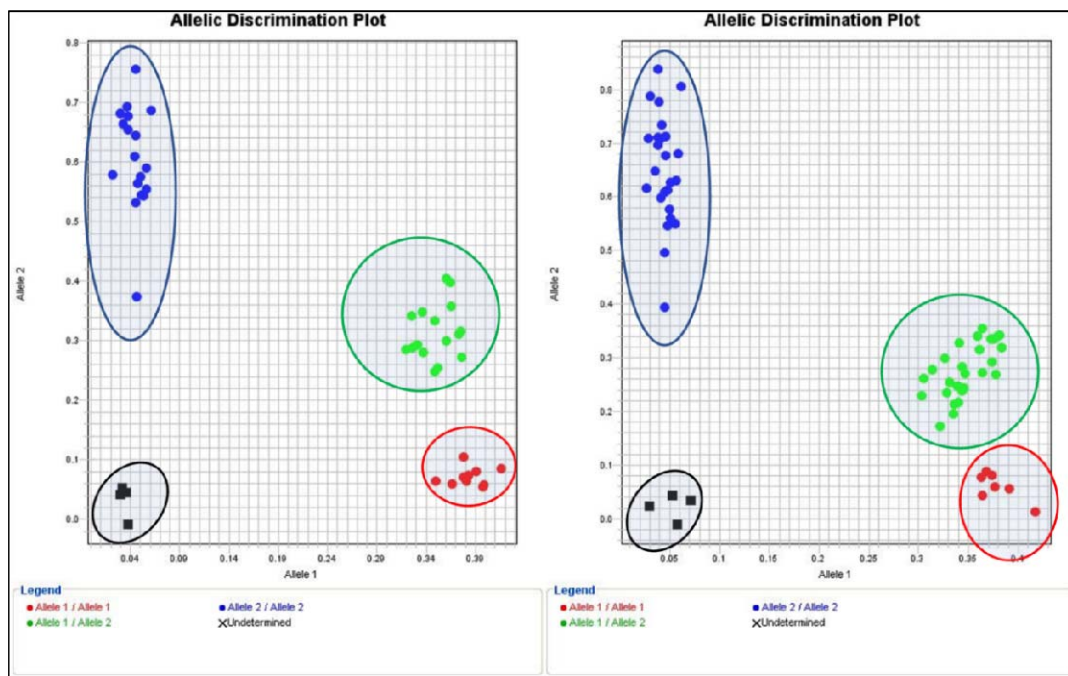

248  
249 **Figure 7.** Shows the discrimination plot of *Serpine 1* rs1799768 mutation with an  
250 additional 3 cycles. Black dots indicate negative control, red dots indicate homozygote  
251 mutant (4G/4G), green dots indicate heterozygote (5G/4G), and blue dots indicate  
252 homozygote wild.

253

## 254 DISCUSSION

255 This study aims to screen genetic risk factors in patients susceptible to thrombophilia  
256 disease by applying the cost-effective PCR technique (KASP-PCR). For this purpose,  
257 left-over blood samples (n = 111) collected from thrombophilia symptomatic patients  
258 were utilized for genetic screening. Approximately 30% of the cases were admitted to  
259 the hospital with chest pain and 20% with abdominal pain. In addition to these  
260 symptoms, vomiting (2.7%), shortness of breath (11%), palpitations (4.5%), dizziness  
261 (10%), and fever (5.5%) were among the most common symptoms recorded. Patients  
262 who apply to the hospital with suspicion of the disease are aged 5-92 (mean = 52), male  
263 and female (62 male, 50 female).

264 KASP-PCR analyses revealed that 92 out of 111 (~83%) patients susceptible to  
265 thrombophilia carry at least one of the analyzed mutations. The age and gender were not  
266 found to be associated with thrombophilia-related polymorphisms ( $P > 0.05$ ). Before  
267 KASP-PCR genotyping testing, the KASP genotyping validation kit was used to  
268 optimize and validate the plate reader. The device was calibrated according to the  
269 passive reference dye ROX™ contained in the KASP master mixture. Optimal FAM,  
270 HEX, and FAM/HEX fluorescence signals were checked and adjusted for the most  
271 efficient signal score. **Figure 1.** shows successful discrimination in testing FAM, HEX,  
272 and FAM/HEX dyes; where FAM is clustered in the Y-axis direction, HEX is clustered  
273 in the X-axis opposite direction, while the FAM/HEX mixture is clustered in the middle.  
274 Moreover, the cycle and re-cycling stages were optimized to obtain the best allelic  
275 discrimination (**Figure2**). Results revealed that two rounds of three re-cycling steps (six  
276 in total) provided the most efficient protocol for robust allelic discrimination.

277 The primary role of the *FV* gene is regulating the production of coagulation  
278 factor V protein. A mutation found in this gene (G1691A) substitutes arginine to  
279 glutamine amino acid at point 506 in a polypeptide of Factor V (Arg506Gln) (Madkhaly  
280 et al., 2021), leading to unresponsiveness to anticoagulant factors (C and S) (Kujovich,  
281 2018). The risk of developing thrombophilia is five times higher in heterozygotes and 50  
282 times higher in homozygotes, and it is responsible for 20-25% of all VTE cases (Bezgin  
283 et al., 2018). It was found to be the most critical genetic risk factor related to  
284 thrombophilia (Djordjevic et al., 2012). The prevalence of *FVL* among the European  
285 population is high, while it is rare in Eastern Asia and Africa. Since the Arab countries  
286 are geographically at the center. The prevalence of *FVL* mutation in different countries  
287 and ethnic groups are listed in **Table 1**. Our results showed that all collected samples are  
288 homozygote wild, except one sample which is heterozygote (No. 61). In **Figure 3.**, the  
289 heterozygote individual was admitted to the hospital with flank pain and dysuria. A  
290 prospective study aims to evaluate the prevalence of *FVL* in 149 healthy Saudi subjects  
291 revealed that 2% of the individuals are heterozygotes, and none of those individuals are  
292 homozygotes mutant (0%) (Almawi et al., 2005). Golestani et al., (2022) investigated  
293 the correlation between acute myocardial infarction (AMI) and *FVL* in the Iranian  
294 population; 5.5% of cases were found to be heterozygotes, while 1% were homozygote  
295 mutants. On the other hand, Gowda et al., (2000) found that among American subjects,

296 8% were heterozygote. Based on these results, the data in the literature is in line with  
 297 and compatible with our results.

298 **Table 1** The prevalence of thrombophilia-associated SNPs according to different  
 299 countries, ethnic groups, and this study.

| <b>Factor V<br/>Leiden</b> | <b>Genotype</b> | <b>Saudi<br/>Arabia</b> | <b>Caucasia</b>         | <b>Asia</b>          | <b>Lebanon</b>      | <b>Tunisia</b>       | <b>Bahrain</b>      | <b>Saudi<br/>Arabia</b> |
|----------------------------|-----------------|-------------------------|-------------------------|----------------------|---------------------|----------------------|---------------------|-------------------------|
|                            | G/A             | 5.5%                    | 7.5%                    | 0%                   | 13.8%               | 5.8%                 | 3%                  | 0.9%                    |
|                            | A/A             | 0.39%                   | 0.2%                    | 0%                   | 1%                  | 0.6%                 | 0%                  | 0%                      |
|                            | GG              | 94.11%                  | 92.3%                   | 100%                 | 85.2%               | 93.6%                | 97%                 | 99.1%                   |
| <b>Reference</b>           |                 | Madkhaly et al, 2021    | Raptopoulou et al, 2022 | Madkhaly et al, 2021 | Almawi et al., 2005 | Almawi et al., 2005) | Almawi et al., 2005 | This study              |

300

| <b>Factor II</b> | <b>Genotype</b> | <b>Saudi<br/>Arabia</b> | <b>Caucasia</b>      | <b>Asia</b>             | <b>Jordan</b>         | <b>Bahrain</b>      | <b>Chechan</b>      | <b>Saudi<br/>Arabia</b> |
|------------------|-----------------|-------------------------|----------------------|-------------------------|-----------------------|---------------------|---------------------|-------------------------|
|                  | G/A             | <b>2.8%</b>             | 4.1%                 | 0.8%                    | 5.7%                  | 1%                  | 1%                  | <b>0%</b>               |
|                  | A/A             | <b>0.09%</b>            | 0.2%                 | 0%                      | 2%                    | 0%                  | 0%                  | <b>1%</b>               |
|                  | G/G             | <b>97.11%</b>           | 95.7%                | 99.2%                   | 92.3%                 | 99%                 | 99%                 | <b>99%</b>              |
| <b>Reference</b> |                 | Madkhaly et al, 2021    | Madkhaly et al, 2021 | Gunathilake et al, 2015 | Al-Zoubi et al., 2021 | Almawi et al., 2005 | Dajani et al., 2012 | This study              |

301

|                     | <b>Genotype</b> | <b>Saudi<br/>Arabia</b> | <b>Caucasia</b>         | <b>Asia</b>      | <b>Jordan</b>      | <b>African<br/>America<br/>n</b> | <b>Lebanon</b>      | <b>Saudi<br/>Arabia</b> |
|---------------------|-----------------|-------------------------|-------------------------|------------------|--------------------|----------------------------------|---------------------|-------------------------|
| <b>MTHFR<br/>I</b>  | C/T             | <b>24%</b>              | 49.3%                   | 45%              | %38                | %26                              | 30%                 | <b>24%</b>              |
|                     | T/T             | <b>2.5%</b>             | 35.9%                   | 22%              | 10%                | 2.7%                             | 4%                  | <b>2%</b>               |
|                     | C/C             | <b>73.5%</b>            | 14.8%                   | 33%              | 52%                | 71.3%                            | 66%                 | <b>74%</b>              |
| <b>MTHFR<br/>II</b> | A/C             | <b>39%</b>              | 40%                     | 44%              | 50%                | 27%                              | 50%                 | <b>40%</b>              |
|                     | C/C             | <b>10%</b>              | 11.5%                   | 5%               | 12%                | 3.6%                             | 24%                 | <b>6%</b>               |
|                     | A/A             | <b>51%</b>              | 48.5%                   | 51%              | 38%                | 69.4%                            | 26%                 | <b>54%</b>              |
| <b>Reference</b>    |                 | AlGasham et al, 2011    | Raptopoulou et al, 2021 | Wang et al, 2016 | Yousef et al, 2013 | Graydon et al, 2019              | Sabbagh et al, 2008 | This study              |

302

| <i>Serpine-1</i> | Genotype | Saudi Arabia       | Caucasia                 | Asia           | Jordan                | UK                | Turkey            | Saudi Arabia      |
|------------------|----------|--------------------|--------------------------|----------------|-----------------------|-------------------|-------------------|-------------------|
|                  | 4G/5G    | <b>33.6%</b>       | 51%                      | 55%            | 39%                   | 43%               | 40%               | <b>41%</b>        |
|                  | 4G/4G    | <b>7.7%</b>        | 23%                      | 26%            | 27%                   | 26%               | 26%               | <b>16%</b>        |
|                  | 5G/5G    | <b>58.7%</b>       | 26%                      | 29%            | 34%                   | 31%               | 34%               | <b>43%</b>        |
| <b>Reference</b> |          | Settin et al, 2012 | Nikolopoulos et al, 2014 | Xu et al, 2016 | Al-Zoubi et al., 2021 | Balta et al. 2003 | Balta et al. 2003 | <b>This study</b> |

303

304 *Prothrombin* is a protein synthesized in the liver and is essential in clotting the  
305 blood (Khan & Dickerman, 2006). As a result of the replacement of guanine with  
306 adenine at position 20210 of the *coagulation factor II (FII)* gene (G20210A), high  
307 concentrations of prothrombin protein are activated (Poudel et al., 2020; Ahmed et al.,  
308 2020; Rennert & DeSimone, 2019). An increase in prothrombin level increases thrombin  
309 level and inhibits Activated Protein C (APC) - inhibits FV protein-, subsequently  
310 stimulating thrombus formation. Thus, the risk of VTE appearance increases. It is  
311 estimated to be the second most important genetic risk factor causing thrombophilia  
312 (Djordjevic et al., 2012). In our experiment, one out of 90 patients carry a homozygous  
313 mutant allele (Patient No. 52, 86 years old male, and suffering from dysuria); no  
314 mutation was detected in other samples (**Figure 4.14**). A study has been conducted to  
315 screen *FII* and *FVL* mutations from eight years-old patient who is suffering from dysuria  
316 and priapism. The genotyping result revealed that the patient was heterozygote for both  
317 mutations (Özbek et al., 2003). At the same time, the patient is homozygote with *FII* and  
318 heterozygote with *FVL*. A retrospective study showed that 2.6% of patients screened for  
319 *FII* are positive through Saudi thrombosis patients (Madkhaly et al., 2021). A cross  
320 sectional study investigate the prevalence of *FII* mutation in Jordanian population; 5.7%  
321 were heterozygote while 2% were homozygote mutant (Al-Zoubi et al., 2021). A group  
322 of healthy Arab population enrolled in a retrospective study to test the distribution of  
323 *FII*. No mutated allele among Saudis was observed, while 1% of heterozygotes in  
324 Bahraini. In Lebanese and Tunisian, 3.6% and 2.6% are heterozygotes, respectively  
325 (Almawi et al., 2005). An amplification refractory mutation detection system (ARMS)  
326 was applied to define the prevalence of *FII* in Chechans populations in Jordan; only 2%  
327 of heterozygotes were detected, while no homozygote mutant (Dajani et al., 2012). The

328 fact that the mutation prevalence in the general population is 2-3% in the western region,  
329 while rare in other geographical regions and all previous literature shows a rare  
330 incidence of FII mutation, which reflects KASP-PCR results.

331 The *MTHFR* gene decreases homocysteine concentration by producing the  
332 MTHFR enzyme to convert the homocysteine to methionine (Hickey et al., 2013; Dean,  
333 2016). Two recognized mutations in the *MTHFR* gene inactivate the enzyme, leading to  
334 increased levels of homocysteine and decreased levels of folate in plasma: C677T  
335 (rs1801133) and A1286C (rs1801131) (Dölek et al., 2007). The American Congress of  
336 Obstetricians and Gynecologists recommends screening for *MTHFR* mutations instead  
337 of homocysteine concentration in patients at risk of thrombophilia (Hickey et al., 2013).  
338 In our experiment, we detected these mutations using KASP-PCR method. The  
339 prevalence of C677T (rs1801133) was ~2% with homozygote mutant, ~24%  
340 heterozygote, and ~75% homozygote wild (**Figure 25**). Whereas the prevalence of  
341 A1286C (rs1801131) was ~6% homozygote, ~40% heterozygote, and ~55%  
342 homozygote wild (**Figure 36**). The prevalence of C677T among Hispanics is over 25%  
343 and between 10-15% among Caucasians and North Americans with homozygote type  
344 (Hickey et al., 2013). Dajani et al, (2013). Investigating the prevalence of C677T among  
345 Chechen and Circassians healthy individuals; 27.5% of Chechen carry the mutation,  
346 while 50% of Circassians. A study reported that 31% of patients with stroke carried  
347 heterozygosity of C677T, while 15% were homozygote mutants. The higher incidence of  
348 that variant is attributed to other risk factors, such as smoking and hypertension  
349 (Djordjevic et al., 2012).

350 A variation in the *serpine 1* gene is represented by the deletion of 4G/5G alleles  
351 in position 675 in chromosome 7 at the promoter region (Xu et al., 2016; Isordia-Salas et  
352 al., 2009; Tsai et al., 2008). The role of the *serpine1* gene is to synthesize plasminogen  
353 activator inhibitor 1 (PAI-1), and the mutation increases production (Morange et al.,  
354 2007). High concentration of PAI-1 leads to inhibit plasmin from fibrinolysis, causing to  
355 accumulate clots in veins (Heit MD, 2013; Morange et al., 2007; Kazuo Miyashita et al.,  
356 2012). The allelic discrimination of KASP-PCR of this mutation showed that ~40% of  
357 samples are heterozygote, while 14.4% were detected as homozygote mutant (**Figure 7**.  
358 **7**). In total, 54% of patients carried PAI-1 variation. Yapikajis et al., (2012) conducted a  
359 genotyping study using blood samples from a healthy Greek population, and 49% were  
360 found mutated. A case-control study was performed to define the correlation between



361 high concentration of PAI-1 and developing ischemic stroke in young Indian patients.  
362 Akhter et al., (2017) found that 62% of young Indian patients have PAI-1 SNP. Xu et  
363 al., (2016) found that ~46% of chronic obstructive pulmonary disease through Chinese  
364 Han patients were heterozygote, while ~14% were homozygote mutants. These results  
365 are in line with the current findings (Table 1).

366

### 367 **Conclusion**

368 A gene panel covering five thrombophilia associated mutations (*Serpine 1*, *MTHFR1*,  
369 *MTHFR2*, *Factor V Leiden*, and *Factor II*) was developed based on the KASP-PCR  
370 assay to diagnose thrombophilia genetic risk factors. The variety of diagnostic tests, the  
371 unreliability of clinical judgment, and a delayed diagnosis could lead to illnesses that  
372 may increase mortality and morbidity. In addition, molecular-based analyses are highly  
373 costly and time-consuming to obtain accurate results compared to the KASP-PCR assay.  
374 The KASP-PCR assay is a cost-effective (~2-3 dollar per reaction), timesaving (3-4  
375 hours), non-invasive, accurate, and highly sensitive. In this study, we obtained a clear  
376 allelic discrimination for all samples tested to screen SNPs related to thrombophilia.  
377 Rather than expensive and time-consuming approaches, the current assay enables the  
378 cost-effective advantage of the KASP-PCR assay, which reduces the diagnostic cost  
379 with a fast and convenient way. After clinical validation and approval, it can be used in  
380 hospitals, research centers, and diagnostic laboratories to determine the genetic  
381 susceptibility of individuals to thrombosis and also for research purposes.

382

383 **Acknowledgment** This study is funded by the Deanship of Graduate Studies under  
384 project number 2023-003-IRMC. The figures are created with BioRender.com.

385

### 386 **Compliance with Ethical Standards**

387 **Conflict of interest** The authors declare that they have no conflict of interest.

388

### 389 **Authors' contributions**

390 HT and RA conceptualized the study. RA and HT conducted the experiments. RA, and  
391 HT wrote the manuscript. AA, TA, MA, HA, NA, AIA identified the patients and  
392 provided the samples. TU revised and commented on the manuscript.

393

394

395

396 **References**

397

398 •Wang X, Fu J, Li Q, Zeng D. Geographical and Ethnic Distributions of the MTHFR  
399 C677T, A1298C and MTRR A66G Gene Polymorphisms in Chinese Populations:  
400 A Meta-Analysis. *PLoS One*. 2016 Apr 18;11(4):e0152414. doi:  
401 10.1371/journal.pone.0152414. PMID: 27089387; PMCID: PMC4835080.

402 Akhter MS, Biswas A, Abdullah SM, Behari M, Saxena R. The Role of PAI-1 4G/5G  
403 Promoter Polymorphism and Its Levels in the Development of Ischemic Stroke in  
404 Young Indian Population. *Clin Appl Thromb Hemost*. 2017 Nov;23(8):1071-1076.  
405 doi: 10.1177/1076029617705728. Epub 2017 May 1. PMID: 28460568.

406 Algasham, A., Ismail, H., Dowaidar, M., & Settin, A. A. (2011).  
407 Methylenetetrahydrofolate Reductase (MTHFR) and Angiotensin Converting  
408 Enzyme (ACE) Gene Polymorphisms among Saudi Population from Qassim  
409 Region. *International Journal of Health Sciences*, 5(2 Suppl 1), 3.

410 Almawi WY, Keleshian SH, Borgi L, Fawaz NA, Abboud N, Mtiraoui N, Mahjoub T.  
411 Varied prevalence of factor V G1691A (Leiden) and prothrombin G20210A single  
412 nucleotide polymorphisms among Arabs. *J Thromb Thrombolysis*. 2005  
413 Dec;20(3):163-8. doi: 10.1007/s11239-005-3550-4. PMID: 16261289.

414 Alvarez-Fernandez, A., Bernal, M. J., Fradejas, I., Martin Ramírez, A., Md Yusuf, N.  
415 A., Lanza, M., ... & Rubio, J. M. (2021). KASP: a genotyping method to rapid  
416 identification of resistance in *Plasmodium falciparum*. *Malaria Journal*, 20(1), 1-8.

417 Al-Zoubi, N., Alrabadi, N., Kheirallah, K., & Alqudah, A. (2021). Prevalence and  
418 Multiplicity of Thrombophilia Genetic Polymorphisms of FV, MTHFR, F II, and  
419 PAI-I: A Cross-Sectional Study on a Healthy Jordanian Population. *International  
420 Journal of General Medicine*, 5323-5332.

421 Badireddy M, Mudipalli VR. Deep Venous Thrombosis Prophylaxis. 2022 Aug 22. In:  
422 StatPearls [Internet]. Treasure Island (FL): StatPearls Publishing; 2022 Jan-.  
423 PMID: 30521286.

424 Balta, G. Ü. N. A. Y., Altay, C., & Gurgey, A. Y. T. E. M. İ. Z. (2003). Prevalence of  
425 PAI-1 gene 4G/5G genotype in Azerbaijan and Kyrgyzstan populations: literature  
426 review. *Journal of Thrombosis and Haemostasis*, 1(4), 858-859.

427 Bezgin T, Kaymaz C, Akbal Ö, Yılmaz F, Tokgöz HC, Özdemir N. Thrombophilic  
428 Gene Mutations in Relation to Different Manifestations of Venous

- 429 Thromboembolism: A Single Tertiary Center Study. *Clin Appl Thromb Hemost.*  
430 2018 Jan;24(1):100-106. doi: 10.1177/1076029616672585. Epub 2016 Oct 11.  
431 PMID: 27729560; PMCID: PMC6714624.
- 432 Dajani, R., Fatahallah, R., Dajani, A., Al-Shboul, M., & Khader, Y. (2012). Prevalence  
433 of coagulation factor II G20210A and factor V G1691A Leiden polymorphisms in  
434 Chechans, a genetically isolated population in Jordan. *Molecular biology reports,*  
435 39, 9133-9138.
- 436 Dajani, R., Fathallah, R., Arafat, A., AbdulQader, M. E., Hakooz, N., Al-Motassem, Y.,  
437 & El-Khateeb, M. (2013). Prevalence of MTHFR C677T single nucleotide  
438 polymorphism in genetically isolated populations in Jordan. *Biochemical genetics,*  
439 51, 780-788.
- 440 Dean L. Methylenetetrahydrofolate Reductase Deficiency. 2012 Mar 8 [updated 2016  
441 Oct 27]. In: Pratt VM, Scott SA, Pirmohamed M, Esquivel B, Kane MS, Kattman  
442 BL, Malheiro AJ, editors. *Medical Genetics Summaries* [Internet]. Bethesda  
443 (MD): National Center for Biotechnology Information (US); 2012-. PMID:  
444 28520345.
- 445 Djordjevic V, Stankovic M, Brankovic-Sreckovic V, Rakicevic L, Damnjanovic T,  
446 Antonijevic N, Radojkovic D. Prothrombotic genetic risk factors in stroke: a  
447 possible different role in pediatric and adult patients. *Clin Appl Thromb Hemost.*  
448 2012 Nov;18(6):658-61. doi: 10.1177/1076029611432136. Epub 2012 Jan 23.  
449 PMID: 22275392.
- 450 Dölek, B., Eraslan, S., Eroğlu, S., Kesim, B. E., Ulutin, T., Yalçiner, A., ... &  
451 Gözükmızı, N. (2007). Molecular analysis of factor V Leiden, factor V Hong  
452 Kong, factor II G20210A, methylenetetrahydrofolate reductase C677T, and  
453 A1298C mutations related to Turkish thrombosis patients. *Clinical and Applied*  
454 *Thrombosis/Hemostasis,* 13(4), 435-438.
- 455 Golestani, A., Rahimi, A., Moridi, N. et al. Association of factor V Leiden R506Q,  
456 FXIIIVal34Leu, and MTHFR C677T polymorphisms with acute myocardial  
457 infarction. *Egypt J Med Hum Genet* 23, 118 (2022).  
458 <https://doi.org/10.1186/s43042-022-00330-9>.
- 459 Gowda, M.S., Zucker, M.L., Vacek, J.L. et al. Incidence of Factor V Leiden in Patients  
460 with Acute Myocardial Infarction. *J Thromb Thrombolysis* 9, 43-45 (2000).  
461 <https://doi.org/10.1023/A:1018652429633>

- 462 Graydon, J. S., Claudio, K., Baker, S., Kocherla, M., Ferreira, M., Roche-Lima, A., ... &  
463 Ruaño, G. (2019). Ethnogeographic prevalence and implications of the 677C> T  
464 and 1298A> C MTHFR polymorphisms in US primary care populations.  
465 *Biomarkers in Medicine*, 13(8), 649-661.
- 466 He, Chunlin, John Holme, and Jeffrey Anthony. "SNP genotyping: the KASP assay."  
467 *Crop breeding*. Humana Press, New York, NY, 2014. 75-86.
- 468 Hickey, S. E., Curry, C. J., & Toriello, H. V. (2013). ACMG Practice Guideline: lack of  
469 evidence for MTHFR polymorphism testing. *Genetics in Medicine*, 15(2), 153-  
470 156.
- 471 Isordia-Salas, I., Leaños-Miranda, A., Sainz, I. M., Reyes-Maldonado, E., & Borrayo-  
472 Sánchez, G. (2009). Association of the plasminogen activator inhibitor-1 gene  
473 4G/5G polymorphism with ST elevation acute myocardial infarction in young  
474 patients. *Revista Española de Cardiología (English Edition)*, 62(4), 365-372.
- 475 John A. Heit, 14 - *Thrombophilia: Clinical and Laboratory Assessment and*  
476 *Management*, Editor(s): Craig S. Kitchens, Craig M. Kessler, Barbara A. Konkle,  
477 Consultative Hemostasis and Thrombosis (Third Edition), W.B. Saunders, 2013,  
478 Pages 205-239, ISBN 9781455722969, [https://doi.org/10.1016/B978-1-4557-](https://doi.org/10.1016/B978-1-4557-2296-9.00014-2)  
479 [2296-9.00014-2](https://doi.org/10.1016/B978-1-4557-2296-9.00014-2).  
480 (<https://www.sciencedirect.com/science/article/pii/B9781455722969000142>)
- 481 Joint, W. H. O. (1995). *Inherited thrombophilia: report of a Joint WHO* (No.  
482 WHO/HGN/ISTH/WG/95.5. Unpublished). World Health Organization.
- 483 Kazuo Miyashita, Show Nishikawa, Masashi Hosokawa, Chapter 29 - Therapeutic  
484 Effect of Fucoxanthin on Metabolic Syndrome and Type 2 Diabetes, Editor(s):  
485 Debasis Bagchi, Nair Sreejayan, *Nutritional and Therapeutic Interventions for*  
486 *Diabetes and Metabolic Syndrome*, Academic Press, 2012, Pages 367-379, ISBN  
487 9780123850836, <https://doi.org/10.1016/B978-0-12-385083-6.00029-2>.
- 488 Kujovich, J. L. (2018). Factor V Leiden thrombophilia.
- 489 Linnemann, B., & Hart, C. (2019). Laboratory diagnostics in thrombophilia.  
490 *Hämostaseologie*, 39(01), 049-061.
- 491 Madkhaly F, Alshaikh A, Alkhail HA, Alnounou R, Owaidah T. Prevalence of positive  
492 factor V Leiden and prothrombin mutations in samples tested for thrombophilia in  
493 Saudi Arabia. *Am J Blood Res*. 2021 Jun 15;11(3):255-260. PMID: 34322288;  
494 PMCID: PMC8303010.

- 495 Makhoul M, Rambla C, Voss-Fels KP, Hickey LT, Snowdon RJ, Obermeier C.  
496 Overcoming polyploidy pitfalls: a user guide for effective SNP conversion into  
497 KASP markers in wheat. *Theor Appl Genet.* 2020 Aug;133(8):2413-2430. doi:  
498 10.1007/s00122-020-03608-x. Epub 2020 Jun 4. PMID: 32500260; PMCID:  
499 PMC7360542.
- 500 Morange, P. E., Saut, N., Alessi, M. C., Yudkin, J. S., Margaglione, M., Di Minno, G.,  
501 ... & Juhan-Vague, I. (2007). Association of plasminogen activator inhibitor  
502 (PAI)-1 (SERPINE1) SNPs with myocardial infarction, plasma PAI-1, and  
503 metabolic parameters: the HIFMECH study. *Arteriosclerosis, thrombosis, and*  
504 *vascular biology*, 27(10), 2250-2257.
- 505 Nikolopoulos, G., Bagos, P., Tsangaris, I., Tsiara, C., Kopterides, P., Vaiopoulos, A.,  
506 Kapsimali, V., Bonovas, S. & Tsantes, A. (2014). The association between  
507 plasminogen activator inhibitor type 1 (PAI-1) levels, PAI-1 4G/5G  
508 polymorphism, and myocardial infarction: a Mendelian randomization meta-  
509 analysis. *Clinical Chemistry and Laboratory Medicine (CCLM)*, 52(7), 937-950.  
510 <https://doi.org/10.1515/cclm-2013-1124>
- 511 Özbek, N., Ataç, F. B., Verdi, H., & Kayiran, S. M. (2003). Purpura fulminans in a child  
512 with combined heterozygous prothrombin G20210A and factor V Leiden  
513 mutations. *Annals of hematology*, 82, 118-120.
- 514 Raptopoulou, A., Michou, V., Mourtzi, N., Papageorgiou, E. G., Voyiatzaki, C.,  
515 Tsilivakos, V., ... & Bei, T. A. (2022). Large-scale screening for factor V Leiden  
516 (G1691A), prothrombin (G20210A), and MTHFR (C677T) mutations in Greek  
517 population. *Health Science Reports*, 5(4), e457.
- 518 Sabbagh, A. S., Mahfoud, Z., Taher, A., Zaatari, G., Daher, R., & Mahfouz, R. A.  
519 (2008). High prevalence of MTHFR gene A1298C polymorphism in Lebanon.  
520 *Genetic Testing*, 12(1), 75-80.
- 521 Settin, A. A., Alghasham, A., Ali, A., Dowaidar, M., & Ismail, H. (2012). Frequency of  
522 thrombophilic genetic polymorphisms among Saudi subjects compared with other  
523 populations. *Hematology*, 17(3), 176-182.
- 524 Tsai, S. J., Hong, C. J., Liou, Y. J., Yu, Y. W. Y., & Chen, T. J. (2008). Plasminogen  
525 activator inhibitor-1 gene is associated with major depression and antidepressant  
526 treatment response. *Pharmacogenetics and genomics*, 18(10), 869-875.

- 527 Xu X, Wang H, Li H, Cui X, Zhang H. SERPINE1 -844 and -675 polymorphisms and  
528 chronic obstructive pulmonary disease in a Chinese Han population. *Journal of*  
529 *International Medical Research.* 2016;44(6):1292-1301.  
530 doi:10.1177/0300060516664270
- 531 Xu, Y., Duan, L., Wong, D. W. K., Wong, T. Y., & Liu, J. (2016). Semantic  
532 reconstruction-based nuclear cataract grading from slit-lamp lens images. In  
533 *Medical Image Computing and Computer-Assisted Intervention-MICCAI 2016:*  
534 *19th International Conference, Athens, Greece, October 17-21, 2016, Proceedings,*  
535 *Part III 19* (pp. 458-466). Springer International Publishing.
- 536 Yang, S., Yu, W., Wei, X., Wang, Z., Zhao, Y., Zhao, X., ... & Zhang, X. (2020). An  
537 extended KASP-SNP resource for molecular breeding in Chinese cabbage  
538 (*Brassica rapa* L. ssp. *pekinensis*). *Plos one*, 15(10), e0240042.
- 539 Yapijakis, C., Serefoglou, Z., & Voumvourakis, C. (2015). Common Gene  
540 Polymorphisms Associated with Thrombophilia. In (Ed.), *Thrombosis,*  
541 *Atherosclerosis and Atherothrombosis - New Insights and Experimental Protocols.*  
542 IntechOpen. <https://doi.org/10.5772/61859>
- 543 Yapijakis, C., Serefoglou, Z., Nixon, A. M., Vylliotis, A., Ragos, V., & Vairaktaris, E.  
544 (2012). Prevalence of thrombosis-related DNA polymorphisms in a healthy Greek  
545 population. *in vivo*, 26(6), 1095-1101.
- 546 Yousef, A. M., Shomaf, M., Berger, S., Ababneh, N., Bobali, Y., Ali, D., ... & Ismail, S.  
547 (2013). Allele and genotype frequencies of the polymorphic  
548 methylenetetrahydrofolate reductase and colorectal cancer among Jordanian  
549 population. *Asian Pacific Journal of Cancer Prevention*, 14(8), 4559-4565.
- 550 Zhang, Y., Liang, D., Huang, H., Yang, Z., Wang, Y., Yu, Y., ... & Xiao, W. (2020).  
551 Development and application of KASP assays for rapid screening of 8 genetic  
552 defects in Holstein cattle. *Journal of Dairy Science*, 103(1), 619-624.
